# Supplementary material
Source: PubMed Central journal article supplement (PMC7049152)
Supplement: pnas.1920202117.sapp.pdf [file pnas.1920202117.sapp.pdf]

# PNAS

www.pnas.org

## Supplementary Information for

**Kristian K. Kristensen<sup>1,2,\*</sup>, Katrine Zinck Leth-Espensen<sup>1,2,3,\*</sup>, Haydyn D.T. Mertens<sup>4</sup>, Gabriel Birrane<sup>5</sup>, Muthuraman Meiyappan<sup>6</sup>, Gunilla Olivecrona<sup>7</sup>, Thomas J.D. Jørgensen<sup>3</sup>, Stephen G. Young<sup>8,9</sup>, and Michael Ploug<sup>1,2, †</sup>**

From the <sup>1</sup>Finsen Laboratory, Rigshospitalet, DK–2200 Copenhagen N, Denmark; <sup>2</sup>Biotech Research and Innovation Centre (BRIC), University of Copenhagen, DK-2200 Copenhagen N, Denmark; <sup>3</sup>Department of Biochemistry and Molecular Biology, University of Southern Denmark, DK–5320 Odense M, Denmark; <sup>4</sup>European Molecular Biology Laboratory Hamburg, Notkestrasse 85, D-22607 Hamburg, Germany; <sup>5</sup>Division of Experimental Medicine, Beth Israel Deaconess Medical Center, Boston, MA 02215; <sup>6</sup>Discovery Therapeutics, Takeda Pharmaceutical Company Ltd., Cambridge, MA 02142; <sup>7</sup>Department of Medical Biosciences,\*Umeå University, Umeå, Sweden; <sup>8</sup>Department of Medicine, University of California, Los Angeles, CA 90095; <sup>9</sup>Department of Human Genetics, University of California, Los Angeles, CA 90095

**Stephen G. Young and Michael Ploug**

Email: [sgyoung@mednet.ucla.edu](mailto:sgyoung@mednet.ucla.edu) and [m-ploug@finsenlab.dk](mailto:m-ploug@finsenlab.dk)

### **This PDF file includes:**

Supplementary text

Figure S1: SEC-MALS for human LPL in complex with GPIHBP1 and Fab-5D2 or Fab-RF4

Figure S2: Sequence coverage of LPL in HDX-MS experiments.

Figure S3: Deuterium uptake plots in peptic peptides from LPL.

Figure S4: Butterfly plots comparing deuterium uptake in various states of LPL.

Figure S5: Isotope envelopes illustrating correlated and uncorrelated hydrogen-deuterium exchange.

Figure S6: Quantification of correlated deuterium uptake in an LPL peptide by pulse-labelled HDX-MS.

Table S1: Compilation of SAXS data for LPL•GPIHBP1 in complex with Fab-5D2 or Fab-RF4

References for SI reference citation

## Supplementary Information Text

### Materials and Methods

**Surface plasmon resonance.** To define the functional epitope on LPL for the monoclonal antibody 5D2, we determined the binding kinetics for the interactions between immobilized 5D2 and LPL's C-terminal domain (CTD) as well as representative synthetic peptides with surface plasmon resonance (SPR) on a Biacore T200™ system (GE Healthcare). To this end, we first immobilized the monoclonal mouse anti-LPL antibody 5D2 (1) directly on a CM5 sensor chip using *N*-hydroxysuccinimide and *N*-ethyl-*N*-(3-(diethylamino)propyl)-carbodiimide as coupling chemistry. With 5 µg 5D2/ml in 10 mM sodium acetate, pH 5.0, we obtained a surface density of 2300 resonance units (RU), which corresponds to 15.3 fmols 5D2 mAb/mm<sup>2</sup> (assuming one RU ~ 1 pg/mm<sup>2</sup>). Injecting 1 M ethanolamine inactivated excess NHS-esters. Kinetic rate constants for the various analytes were determined using single cycle protocols where five serial 2-fold dilutions of the interaction partner were injected for 200 s without intervening regeneration and followed by a longer dissociation phase after the last injection (2,500 to 30,000 s dependent on the dissociation rate constant  $k_{off}$ ). Interactions were measured at 40 µl/min in 10 mM HEPES, 150 mM NaCl, 3 mM EDTA, and 0.05% (v/v) surfactant P-20 at pH 7.4 at 20°C. Two consecutive injections with 10 µl of 20 mM H<sub>3</sub>PO<sub>4</sub> at the end of each single cycle regenerated the chip.

With the BiacoreT200 Evaluation™ 3.0 software (supplied with the instrument), we globally fitted the double blank-referenced data by non-linear regression to a simple bimolecular interaction model. Assuming pseudo-first order reaction conditions, we derived the association ( $k_{on}$ ) and dissociation ( $k_{off}$ ) rate constants, the  $K_D$  ( $k_{off}/k_{on}$ ), as well as the binding capacity ( $R_{max}$ ).

**Small-angle X-ray scattering (SEC-SAXS).** Synchrotron radiation X-ray scattering data coupled to an in-line chromatography system (SEC-SAXS) were collected on the EMBL P12 beamline of the storage ring PETRA III (DESY, Hamburg) (Table S1) (2), using PILATUS 6M and 2M pixel detectors (DECTRIS, Switzerland). 50-200 µl of concentrated hLPL complexed with GPIHBP1 and a Fab-fragment from the 5D2 antibody was injected onto a Superdex 200 Increase (5/150) column (GE Healthcare) equilibrated in 10 mM Tris, 150 mM NaCl, 10% (v/v) glycerol, 0.05% (w/v) CHAPS (0.8 mM), pH 7.2. Samples were exposed to X-rays while flowing at 0.2 ml/min through a temperature-controlled capillary (1.2 mm I.D.) at 20°C. During sample elution, we collected frames of 1.0 s exposure time. The sample-to-detector distance was 2.7 m covering a range of momentum transfer and  $0.008 \text{ \AA}^{-1} \leq s \leq 0.6 \text{ \AA}^{-1}$  ( $s = 4\pi\sin\theta/\lambda$ , where  $2\theta$  is the scattering angle, and  $\lambda = 1.24 \text{ \AA}$  is the X-ray wavelength). Data from the detector were normalized to the transmitted beam intensity, averaged, placed on absolute scale relative to water and the scattering of buffer solutions subtracted using CHROMIXS (3).

All data manipulations were performed with PRIMUS $qt$  and the ATSAS software package (4). The forward scattering  $I(0)$  and radius of gyration,  $R_g$  were determined from Guinier analysis (5) assuming that at very small angles ( $s \leq 1.3/R_g$ ) the intensity is represented as  $I(s)=I(0)\exp(-(sR_g)^2/3)$ . These parameters were also estimated from the full scattering curves using the indirect Fourier transform method implemented in the program GNOM (6), along with the distance distribution function  $p(r)$  and the maximum particle dimensions  $D_{max}$ . Molecular masses ( $MM_s$ ) of solutes were estimated from  $I(0)$  by computation of partial specific volume and the contrast between the glycosylated protein and the chemical components of the solution using the SASSIE server (<http://sassie-web.chem.utk.edu/sassie2/>). Theoretical scattering intensities were calculated using the program CRYSO (7).

**Ab initio shape determination.** Low resolution molecular shapes were reconstructed from SAXS data using the programs DAMMIF (8), which represents the macromolecule as a densely packed interconnected configuration of beads or chain-like ensemble of dummy residues, respectively, that best fits the experimental data  $I_{exp}(s)$  by minimizing the discrepancy:

$$\chi^2 = \frac{1}{N-1} \sum_j \left[ \frac{I_{exp}(s_j) - cI_{calc}(s_j)}{\sigma(s_j)} \right]^2$$

where  $N$  is the number of experimental points,  $c$  is a scaling factor and  $I_{calc}(s_j)$  and  $\sigma(s_j)$  are the calculated intensity and the experimental error at the momentum transfer  $s_j$ , respectively. Multiple modeling runs were conducted to verify the stability of the solution, and to establish the most typical 3D reconstructions according to a spatial discrepancy measure using DAMAVER (9).

**Hybrid Rigid body modeling.** Rigid body models were computed from the experimental data using CORAL (10) and the available high-resolution structures of GPIHBP1•LPL (PDB 6E7K) and a representative monoclonal antibody fragment (PDB 1FGN) as rigid bodies. Glycosylation was introduced into the models based on mass spectrometry data using the GLYCOSYLATION routine of ATSAS (4) with a single C<sub>40</sub>N<sub>2</sub>O<sub>29</sub>H<sub>67</sub> glycan attached to GPIHBP1 (Asn<sup>58</sup>) and two C<sub>68</sub>N<sub>4</sub>O<sub>49</sub>H<sub>113</sub> glycans attached to hLPL (Asn<sup>43</sup> & Asn<sup>359</sup>). Ambiguous distance restraints were employed for the GPIHBP1•LPL•5D2 structure calculations, with a 15 Å average distance between residues Asp<sup>28</sup>, Lys<sup>30</sup>, Gly<sup>68</sup>, Glu<sup>93</sup> (light chain); Glu<sup>54</sup>, Ser<sup>101</sup> (heavy chain) of the antibody, and the tryptophan-rich motif loop residues encompassed by Tyr<sup>414</sup> and Ser<sup>422</sup> of LPL used. SAXS data are deposited at the SASBDB ([www.sasbdb.org](http://www.sasbdb.org)) with accession code: SASDHF4.

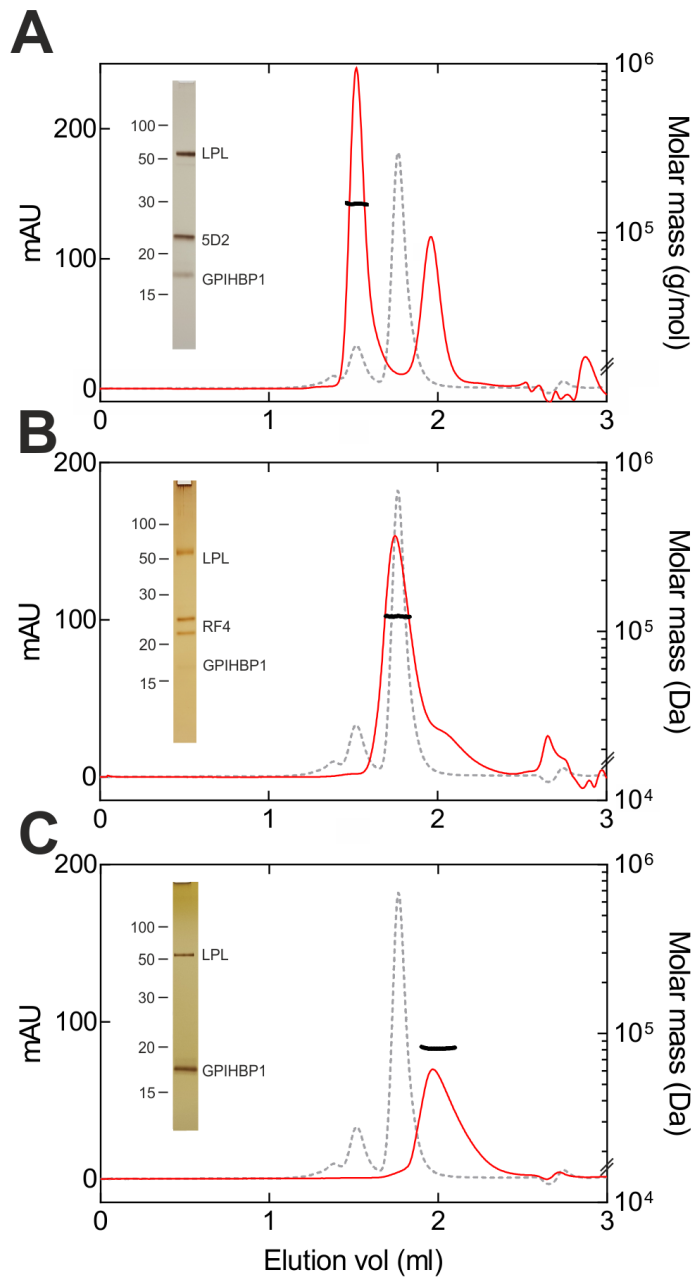

**Fig. S1.** Size-exclusion chromatography of hLPL complexes with multi-angle light scattering detection. *Panel A.* Elution of GPIHBP1•LPL•Fab-5D2 after size-exclusion chromatography on a Superdex200 Increase column in 10 mM Tris, 150 mM NaCl, 0.05% (w/v) CHAPS, 10% (v/v) glycerol, 0.05% (w/v) NaN<sub>3</sub>, pH 7.2. *Panel B.* Elution of GPIHBP1•hLPL•Fab-RF4, note the late elution volume compared to the corresponding complex with Fab-5D2. *Panel C.* Elution of GPIHBP1•hLPL. The red lines show the absorbance profiles at 280 nm for the samples under investigation; the light gray hatched lines show the BSA control (monomer, dimer, trimer). The molecular masses determined using refractive indices as well as scattering profiles are shown as solid black lines. The presence of all the various proteins (LPL, GPIHBP1, Fabs) in the eluting peak fractions were verified by SDS-PAGE of reduced and alkylated samples followed by silver staining (insets). Note, Fab-RF4 contains two polypeptides, which differ in their masses as confirmed by ESI-MS (see Fig. 3).

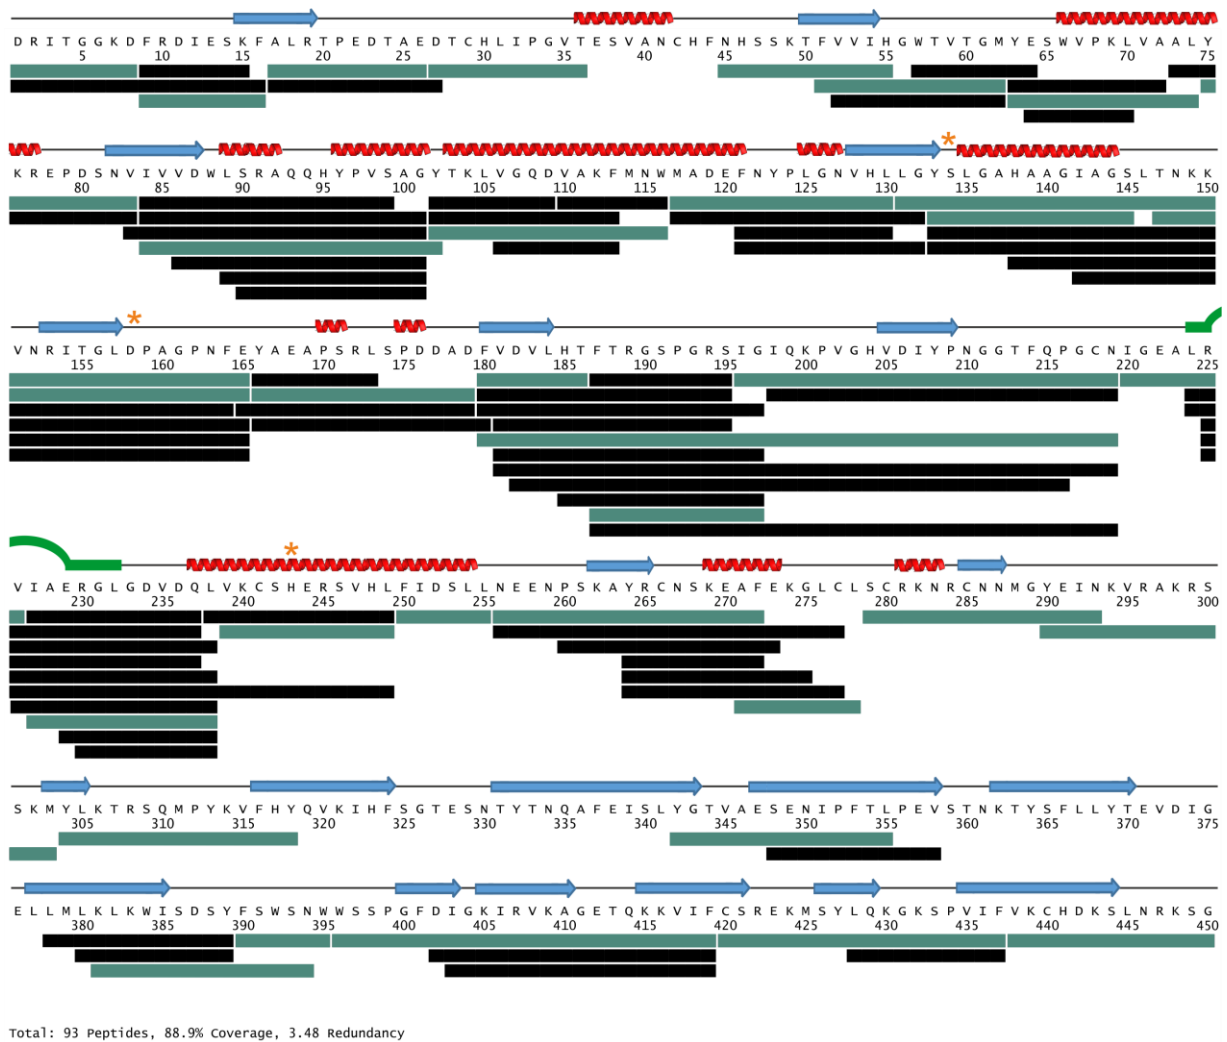

**Fig. S2.** A total of 93 peptic peptides were identified for bLPL, corresponding to an overall sequence coverage of 89%. The bars shown beneath the primary sequence of bLPL identify each of the 93 peptic peptides. The deuterium uptake values for peptides identified by the *green* bars are shown in *SI Appendix*, Fig. S3. Red helices and blue arrows above the primary sequence highlight secondary structure elements in LPL ( $\alpha$ -helices and  $\beta$ -sheets, respectively). Orange asterisks show the catalytic triad residues, and the green loop indicates the position of the lid covering the active pocket.

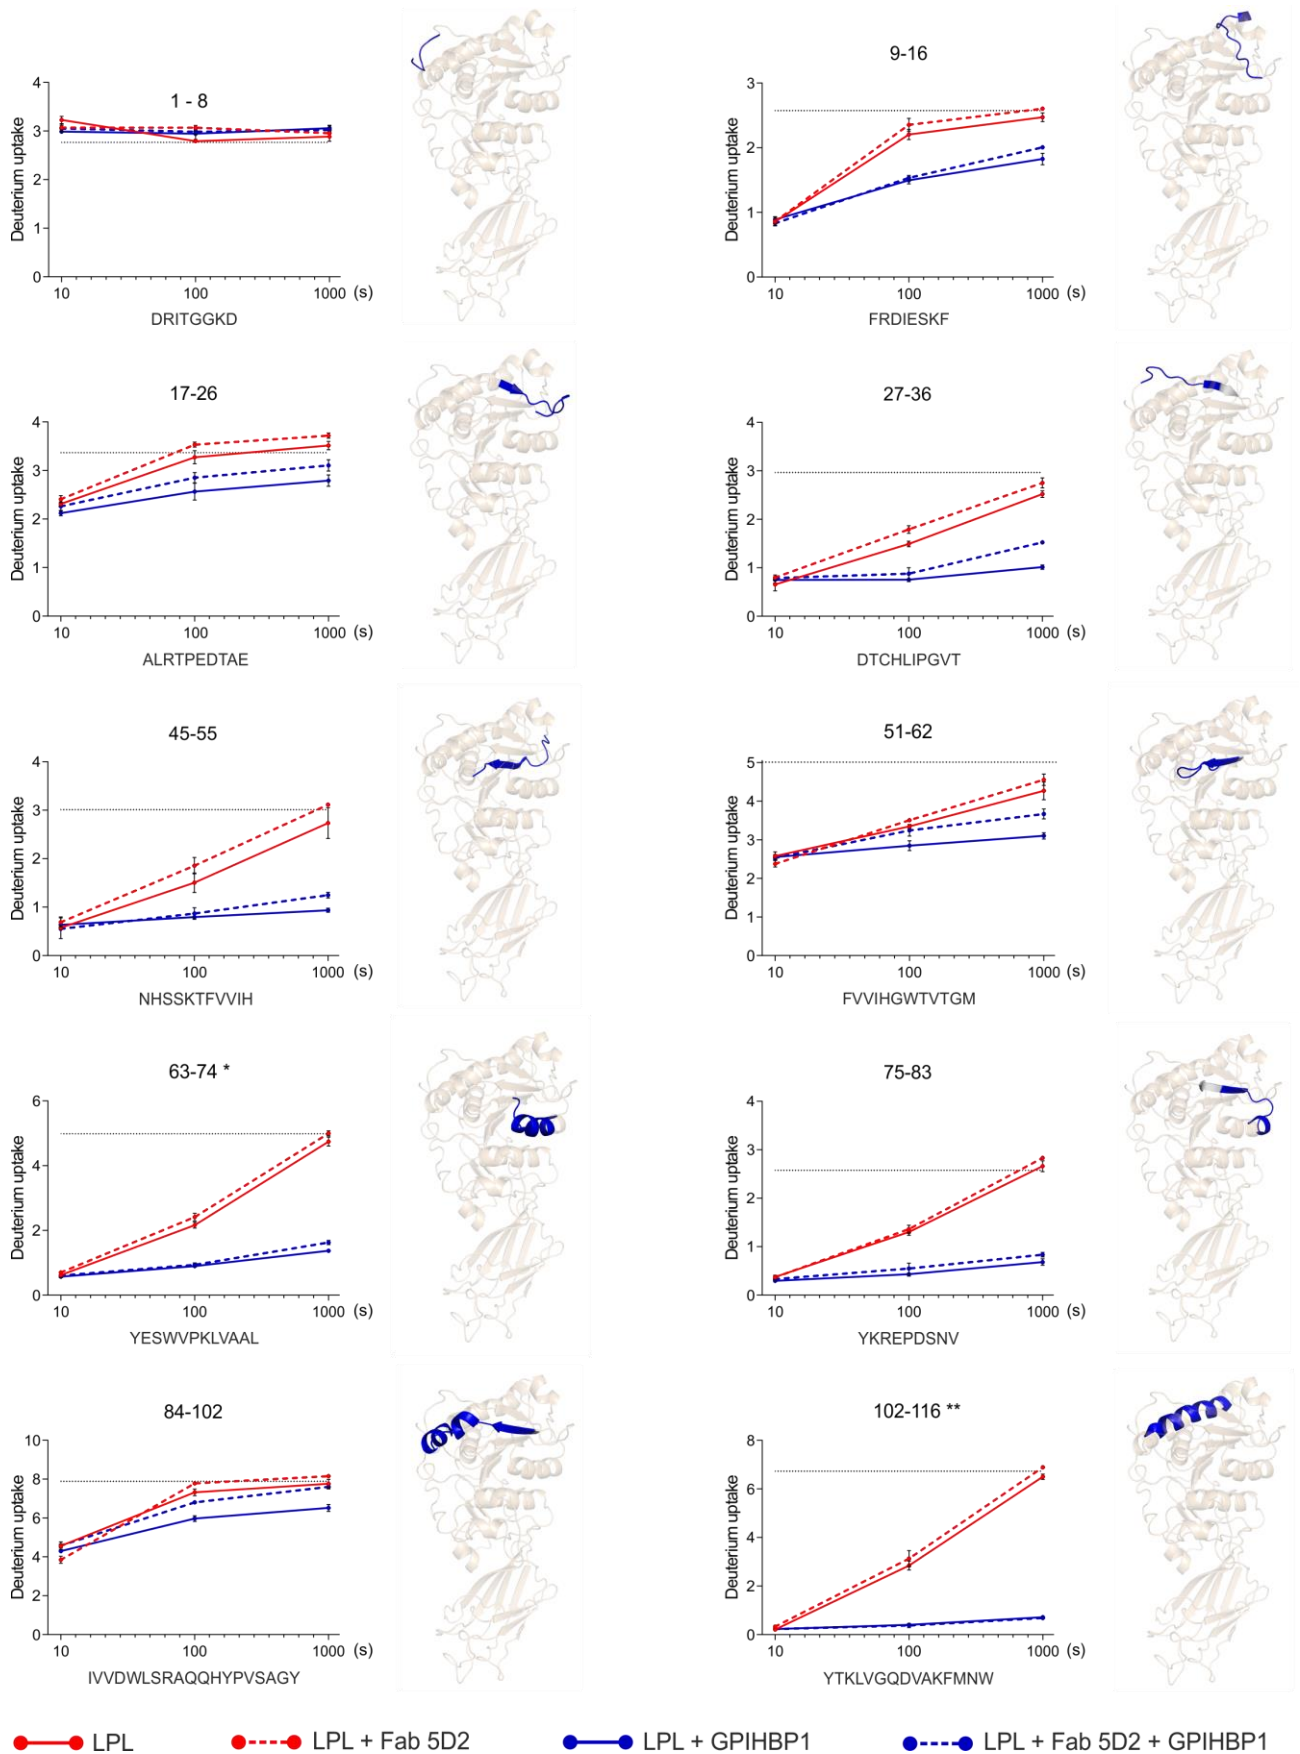

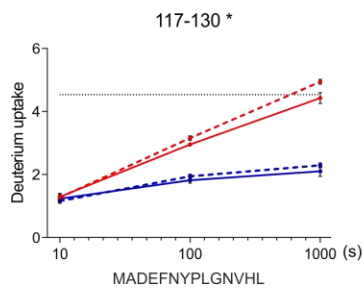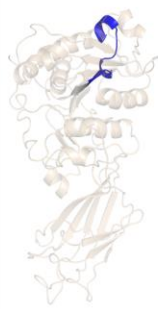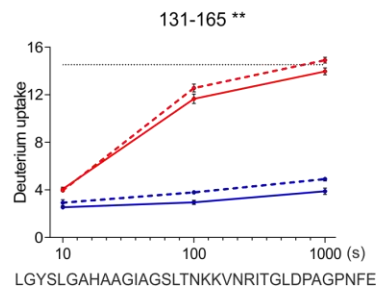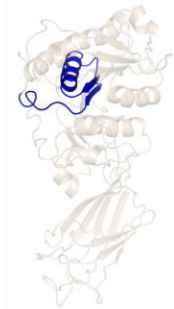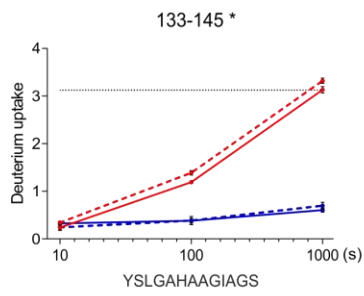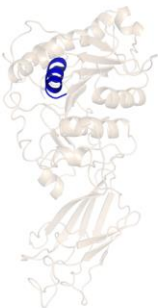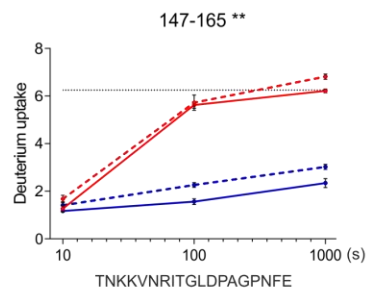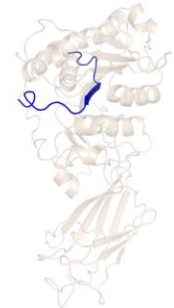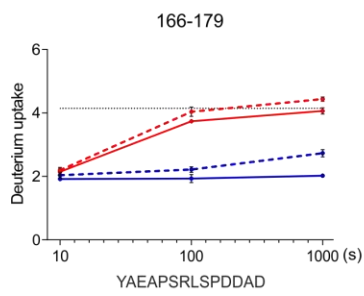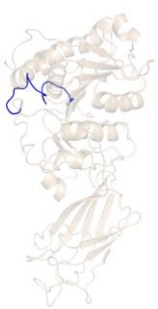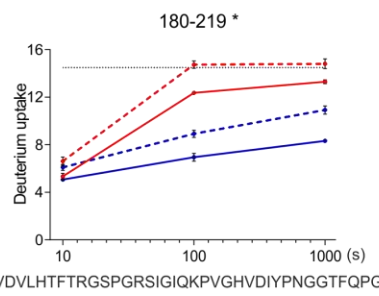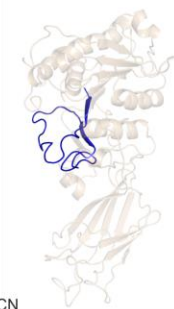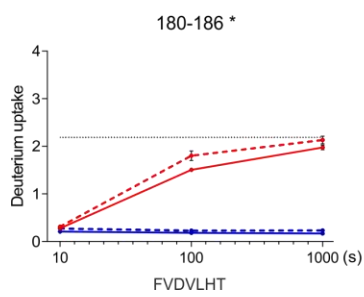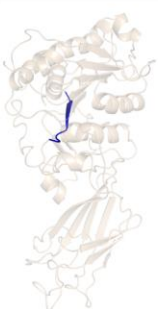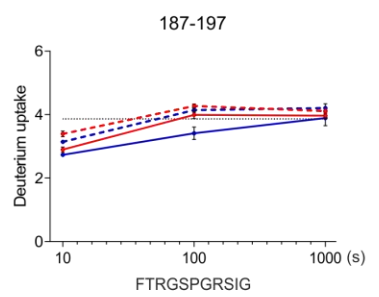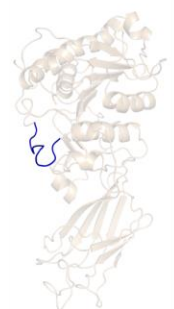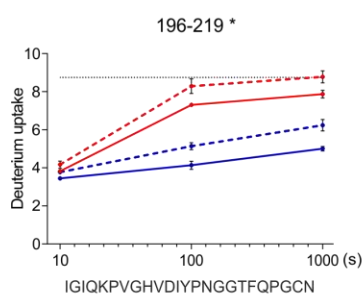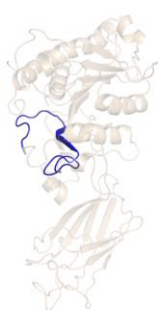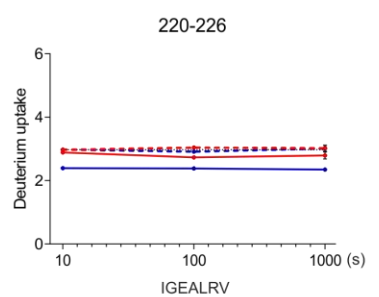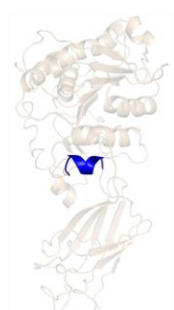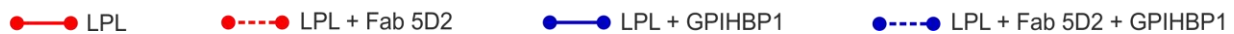

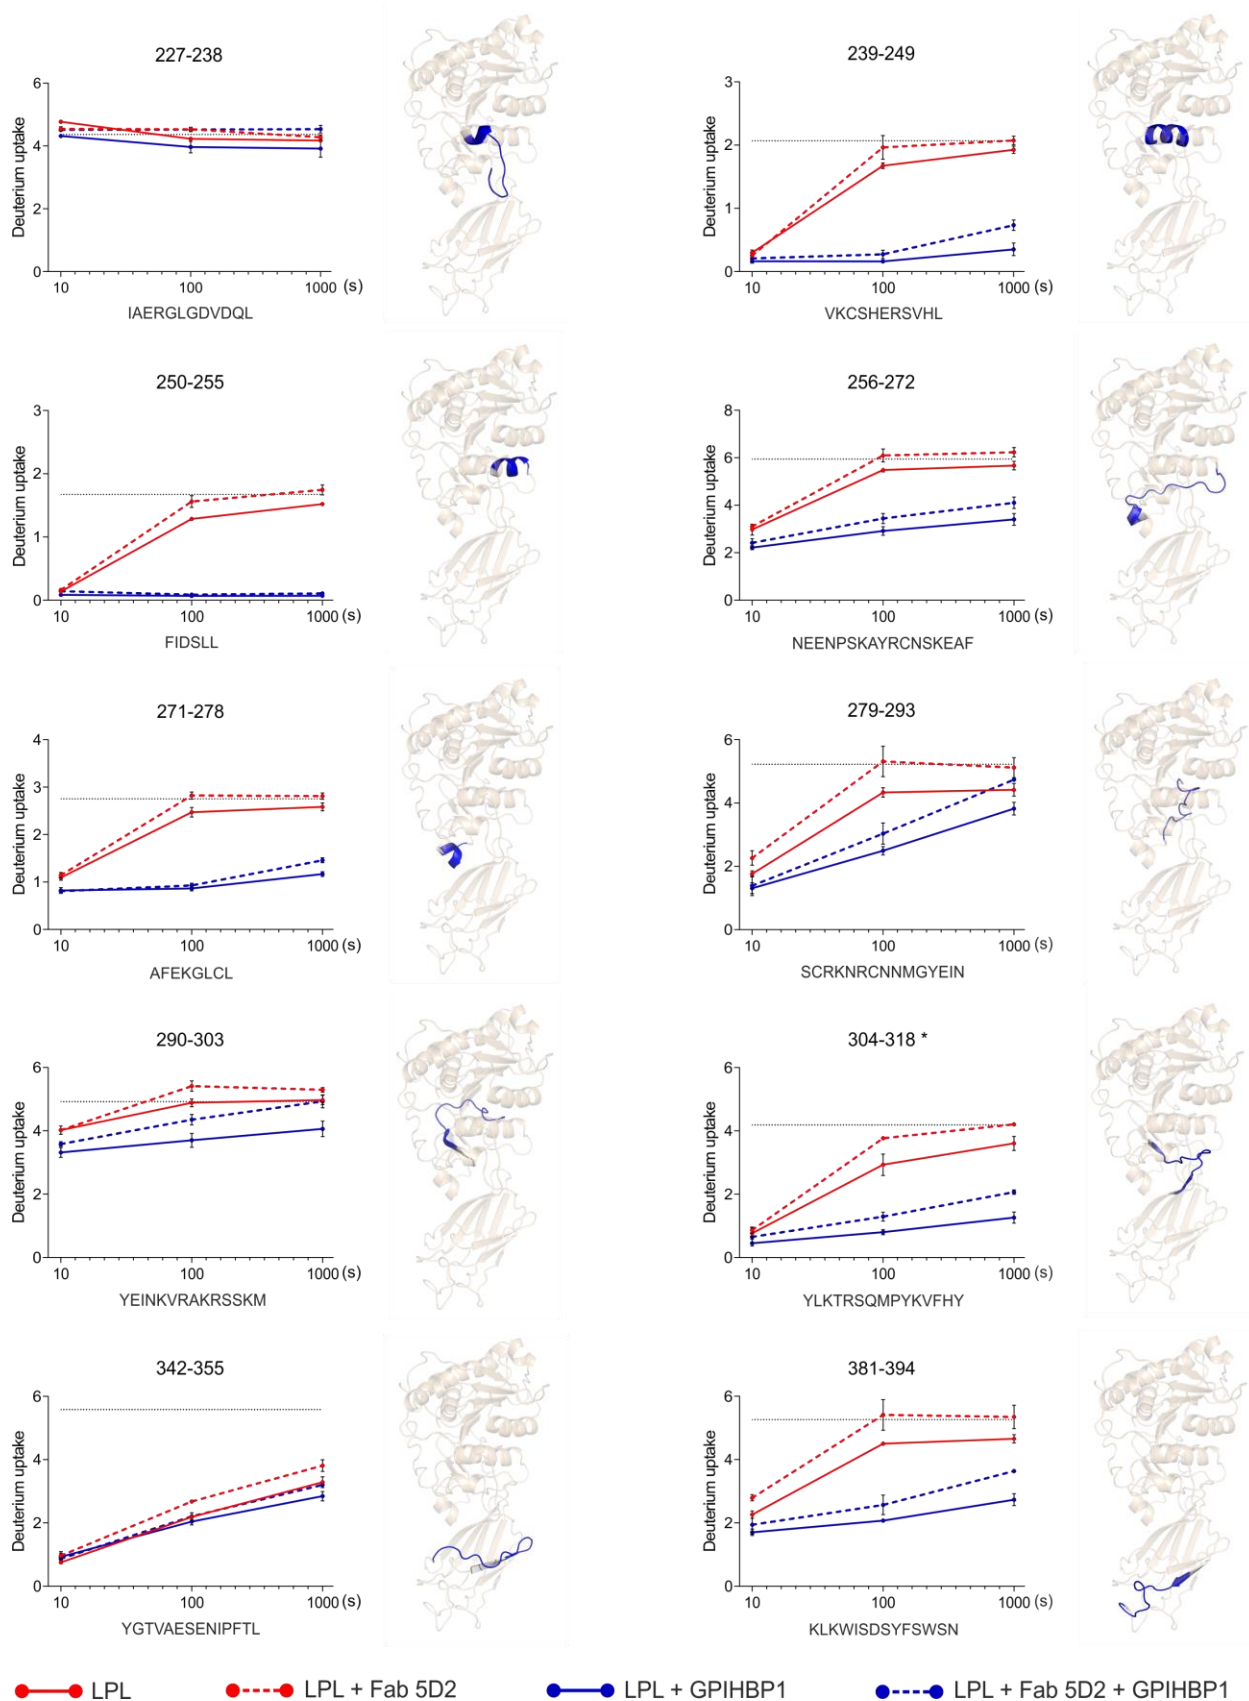



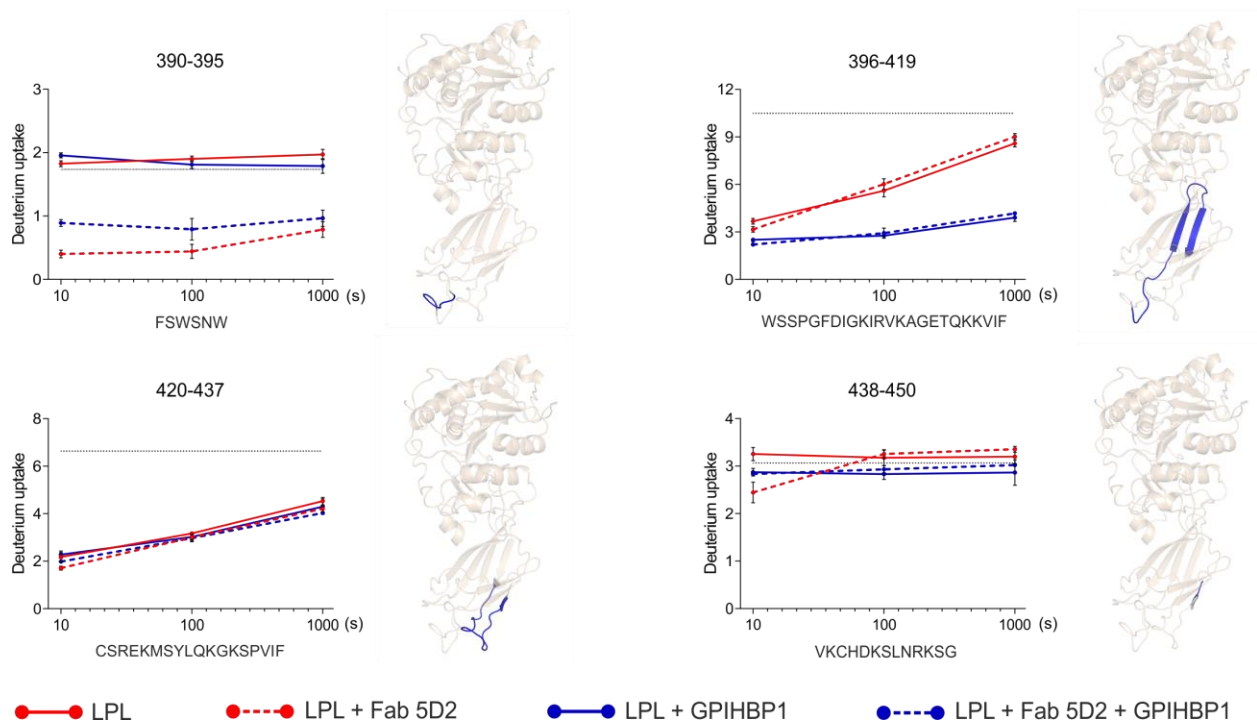

**Fig. S3.** Time-dependent deuterium uptake in bLPL alone and complexed with Fab-5D2 and/or GPIHBP1. These plots show the deuterium uptake in 43 peptic peptides covering the majority of LPL's primary sequence, both for LPL alone and LPL complexed with Fab-5D2 and/or GPIHBP1. The red lines show LPL; the blue lines show LPL•GPIHBP1 complexes, and the broken lines show the presence of Fab-5D2 in those samples. The position of the individual peptides in the LPL structure are highlighted by blue in the cartoon representation of LPL prepared with PyMol (Schrödinger) using the crystal structure of human LPL (PDB code 6OB0) (11) and their primary sequences are shown below the uptake plots. The deuterium content represent the average mass of the isotope envelopes and is shown as mean of three replicates with S.D. Signatures in the individual isotope envelopes suggesting correlated exchanges or coexisting conformations are marked by \*(peak broadening) and \*\*(bimodal isotope distribution).

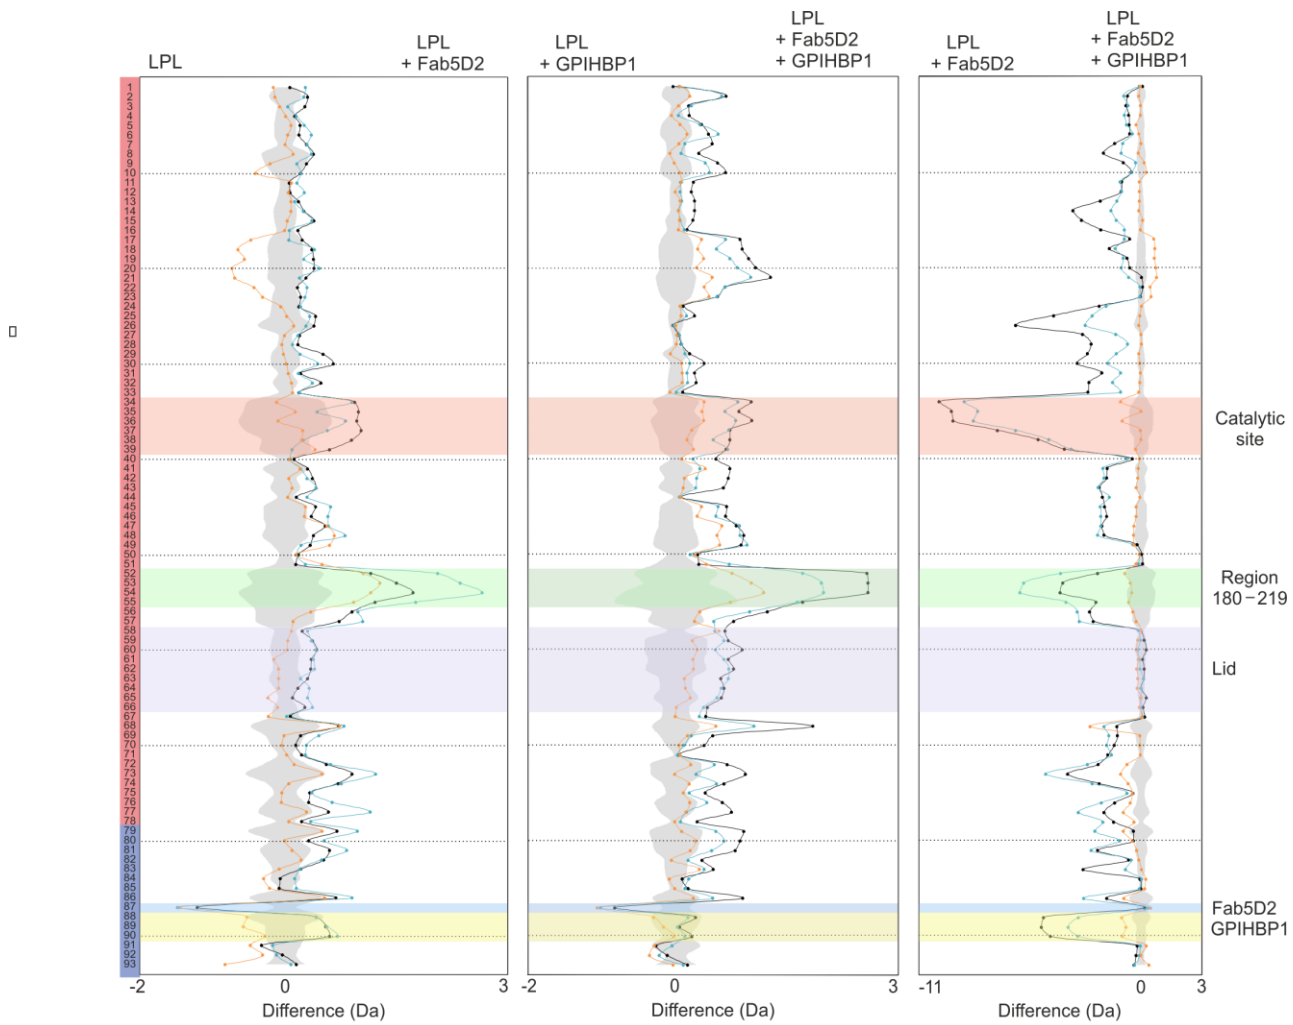

| Peptide No. | Start | End | Sequence                                  | Peptide No. | Start | End | Sequence                               |
|-------------|-------|-----|-------------------------------------------|-------------|-------|-----|----------------------------------------|
| 1           | 1     | 8   | DRITGGKD                                  | 48          | 181   | 195 | VDVLHTFTRGSPGRS                        |
| 2           | 1     | 16  | DRITGGKDFRDIESKF                          | 49          | 181   | 197 | VDVLHTFTRGSPGRSIG                      |
| 3           | 9     | 15  | FRDIESK                                   | 50          | 181   | 219 | VDVLHTFTRGSPGRSIGQKPVGHVDIYPNGGTFQPGCN |
| 4           | 9     | 16  | FRDIESKF                                  | 51          | 182   | 216 | HTFTRGSPGRSIGIQLKPVGHVDIYPNGGTFQPGCN   |
| 5           | 17    | 26  | ALRTPEDTAE                                | 52          | 185   | 197 | HTFTRGSPGRSIG                          |
| 6           | 17    | 27  | ALRTPEDTAE                                | 53          | 187   | 195 | FTRGSPGRS                              |
| 7           | 27    | 36  | DTCHLIPGVT                                | 54          | 187   | 197 | FTRGSPGRSIG                            |
| 8           | 45    | 55  | NHSSKTFVVIH                               | 55          | 187   | 219 | FTRGSPGRSIGIQLKPVGHVDIYPNGGTFQPGCN     |
| 9           | 51    | 62  | FVVIHGWTVTGM                              | 56          | 196   | 219 | IGIQLKPVGHVDIYPNGGTFQPGCN              |
| 10          | 52    | 62  | VVIHGWTVTGM                               | 57          | 198   | 219 | IQLKPVGHVDIYPNGGTFQPGCN                |
| 11          | 57    | 64  | YESWVPKL                                  | 58          | 220   | 226 | IGEALRV                                |
| 12          | 63    | 72  | YESWVPKLVA                                | 59          | 224   | 237 | LRVIAERGLGDVDQ                         |
| 13          | 63    | 74  | YESWVPKLVAAL                              | 60          | 224   | 238 | LRVIAERGLGDVDQL                        |
| 14          | 64    | 70  | ESWVPKL                                   | 61          | 225   | 237 | RVIAERGLGDVDQ                          |
| 15          | 73    | 83  | ALYKREPSNV                                | 62          | 225   | 238 | RVIAERGLGDVDQL                         |
| 16          | 75    | 83  | YKREPSNV                                  | 63          | 225   | 249 | RVIAERGLGDVDQLVKCSHERSVHL              |
| 17          | 83    | 101 | IVVDWLSRAQQHYVPSAG                        | 64          | 226   | 238 | IAERGLGDVDQL                           |
| 18          | 84    | 99  | IVVDWLSRAQQHYVPS                          | 65          | 227   | 237 | IAERGLGDVDQ                            |
| 19          | 84    | 101 | IVVDWLSRAQQHYVPSAG                        | 66          | 227   | 238 | IAERGLGDVDQL                           |
| 20          | 84    | 102 | IVVDWLSRAQQHYVPSAGY                       | 67          | 229   | 238 | ERGLGDVDQL                             |
| 21          | 86    | 101 | VDWLSRAQQHYVPSAG                          | 68          | 230   | 238 | RGLGDVDQL                              |
| 22          | 89    | 101 | LSRAQQHYVPSAG                             | 69          | 238   | 249 | LVKCSHERSVHL                           |
| 23          | 90    | 101 | SRAQQHYVPSAG                              | 70          | 239   | 249 | VKCSHERSVHL                            |
| 24          | 102   | 109 | YTKLVGQD                                  | 71          | 250   | 255 | FIDSL                                  |
| 25          | 102   | 113 | YTKLVGQDVAKF                              | 72          | 256   | 272 | NEENPSKAYRCNSKEAF                      |
| 26          | 102   | 116 | YTKLVGQDVAKFMNW                           | 73          | 256   | 277 | NEENPSKAYRCNSKEAFEKGLC                 |
| 27          | 106   | 113 | VGQDVAKF                                  | 74          | 260   | 273 | PSKAYRCNSKEAFE                         |
| 28          | 110   | 116 | VAKFMNW                                   | 75          | 264   | 272 | YRCNSKEAF                              |
| 29          | 117   | 130 | MADEFNPLGNVHL                             | 76          | 264   | 275 | YRCNSKEAFEKG                           |
| 30          | 117   | 132 | MADEFNPLGNVHLLG                           | 77          | 264   | 277 | YRCNSKEAFEKGLC                         |
| 31          | 121   | 130 | FNPLGNVHL                                 | 78          | 271   | 278 | AFEKGLC                                |
| 32          | 121   | 132 | FNPLGNVHLLG                               | 79          | 279   | 293 | SCRKNRCNMMGYEIN                        |
| 33          | 133   | 145 | YSLGAHAAGIAGS                             | 80          | 290   | 303 | YEINKVRAKRSKYM                         |
| 34          | 131   | 165 | LGYSLGAHAAGIAGSLTNKKVNRITGLDPAGPNFE       | 81          | 304   | 318 | YLKTRSQMPYKVFHY                        |
| 35          | 133   | 164 | YSLGAHAAGIAGSLTNKKVNRITGLDPAGPNF          | 82          | 342   | 355 | YGTVAESENIPFTL                         |
| 36          | 133   | 165 | YSLGAHAAGIAGSLTNKKVNRITGLDPAGPNFE         | 83          | 348   | 358 | SENIPFTLPEV                            |
| 37          | 138   | 165 | HAAGIAGSLTNKKVNRITGLDPAGPNFE              | 84          | 378   | 389 | LMLLKLKWSIDSY                          |
| 38          | 142   | 165 | IAGSLTNKKVNRITGLDPAGPNFE                  | 85          | 380   | 389 | LKLKWSIDSY                             |
| 39          | 147   | 165 | TNKKVNRITGLDPAGPNFE                       | 86          | 381   | 394 | KLKWSIDSYFWSN                          |
| 40          | 165   | 179 | EYAEAPSRSLPDDAD                           | 87          | 390   | 395 | FWSN                                   |
| 41          | 166   | 173 | YAEAPSR                                   | 88          | 396   | 419 | WSSPGFDIGKIRKAGETQKKVIF                |
| 42          | 166   | 179 | YAEAPSRSLPDDAD                            | 89          | 402   | 419 | DIGKIRKAGETQKKVIF                      |
| 43          | 166   | 180 | YAEAPSRSLPDDADF                           | 90          | 403   | 419 | IGKIRKAGETQKKVIF                       |
| 44          | 180   | 186 | FVDVLT                                    | 91          | 420   | 437 | CSREKMSYLQKGVKPVIF                     |
| 45          | 180   | 195 | FVDVLTFTTRGSPGRS                          | 92          | 428   | 437 | LQKGVKPVIF                             |
| 46          | 180   | 197 | FVDVLTFTTRGSPGRSIG                        | 93          | 438   | 450 | VKCHDKSLNRKSG                          |
| 47          | 180   | 219 | FVDVLTFTTRGSPGRSIGIQLKPVGHVDIYPNGGTFQPGCN |             |       |     |                                        |

**Fig. S4.** Comparison of deuterium uptake in all peptic peptides recovered from LPL in different complexes with butterfly plots. These plots compare the differences in deuterium uptake for all peptic peptides recovered from bLPL in the different states: LPL *versus* LPL•Fab-5D2 (*panel A*); LPL•GPIHBP1 *versus* LPL•GPIHBP1•Fab-5D2 (*panel B*); and LPL•Fab-5D2 *versus* LPL•GPIHBP1•Fab-5D2 (*panel C*). In the case of bimodal peaks, deuterium uptake represent the average mass of both isotope envelopes and is the mean of three replicates. The shaded gray area corresponds to the largest standard deviation in the data sets recorded for each peptide (in triplicates). Transparent red and cyan colors on the left assign peptides to LPL's N-terminal hydrolase domain (NTD) or its C-terminal lipid-binding domain (CTD), respectively. The color shaded areas in the graphs highlight peptides covering the catalytic triad (red), the region 180–219 just before the lid (green), the lid (blue), the Fab-5D2 binding epitope (blue), and the GPIHBP1 binding epitope (yellow). The identity of the 93 unique peptic peptides recovered from LPL are shown in the bottom.

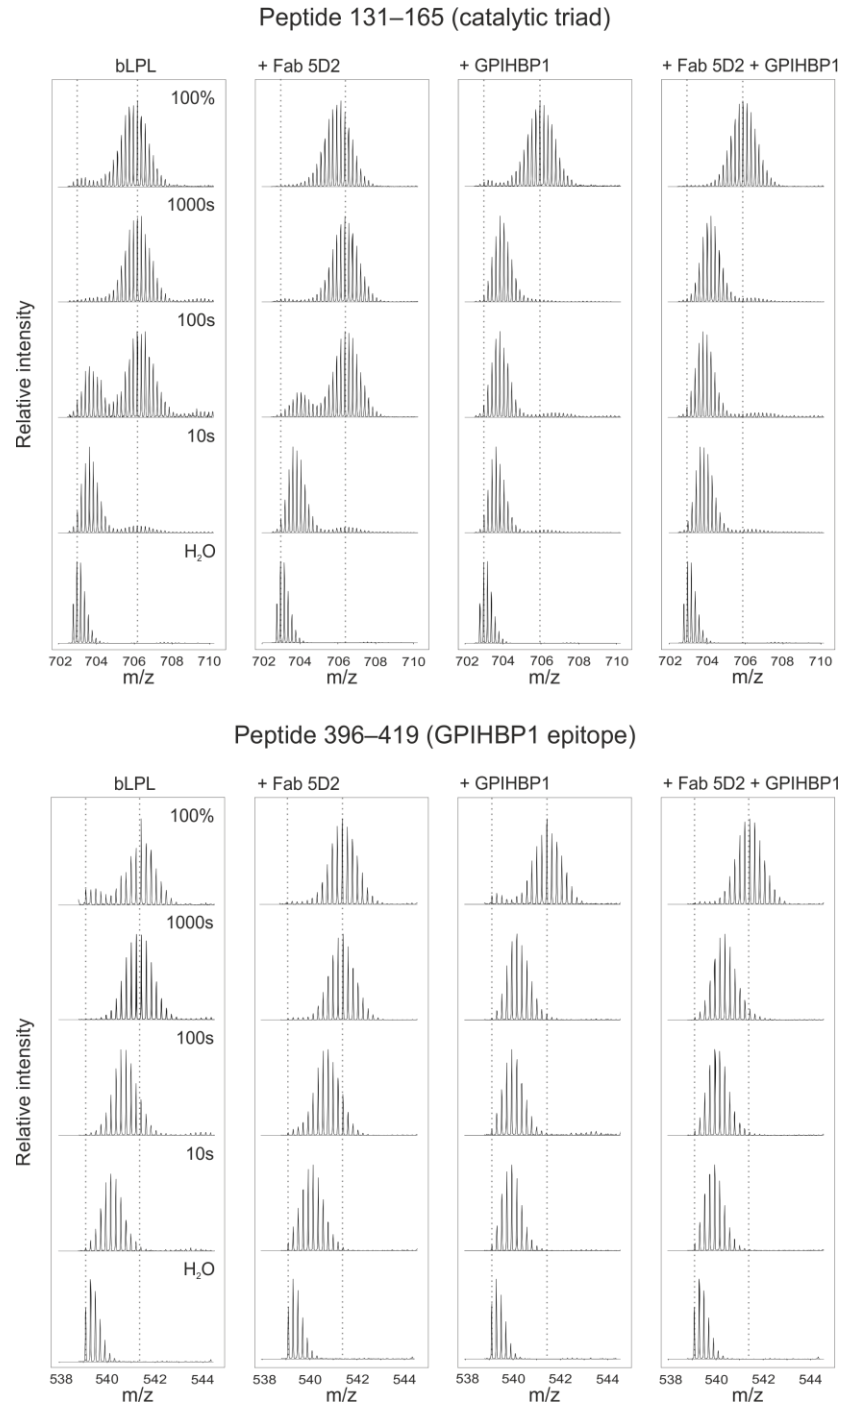

**Fig. S5.** Isotope envelopes revealing correlated and uncorrelated deuterium uptake in two different regions of LPL. The upper panel shows the temporal incorporation of deuterium into a region of LPL harboring the catalytic triad (residues 131–165). This region exhibits correlated exchange kinetics (resembling that of EX1), which signifies the progressive accumulation of protein populations with long-lived solvent exposure of that region (12). Binding GPIHBP1, but not Fab-5D2, prevents this slow transition. The lower panel shows a region of LPL exhibiting uncorrelated deuterium exchange (resembling EX2 kinetics) and binding of GPIHBP1 slows the rate of this exchange (residues 396–419).

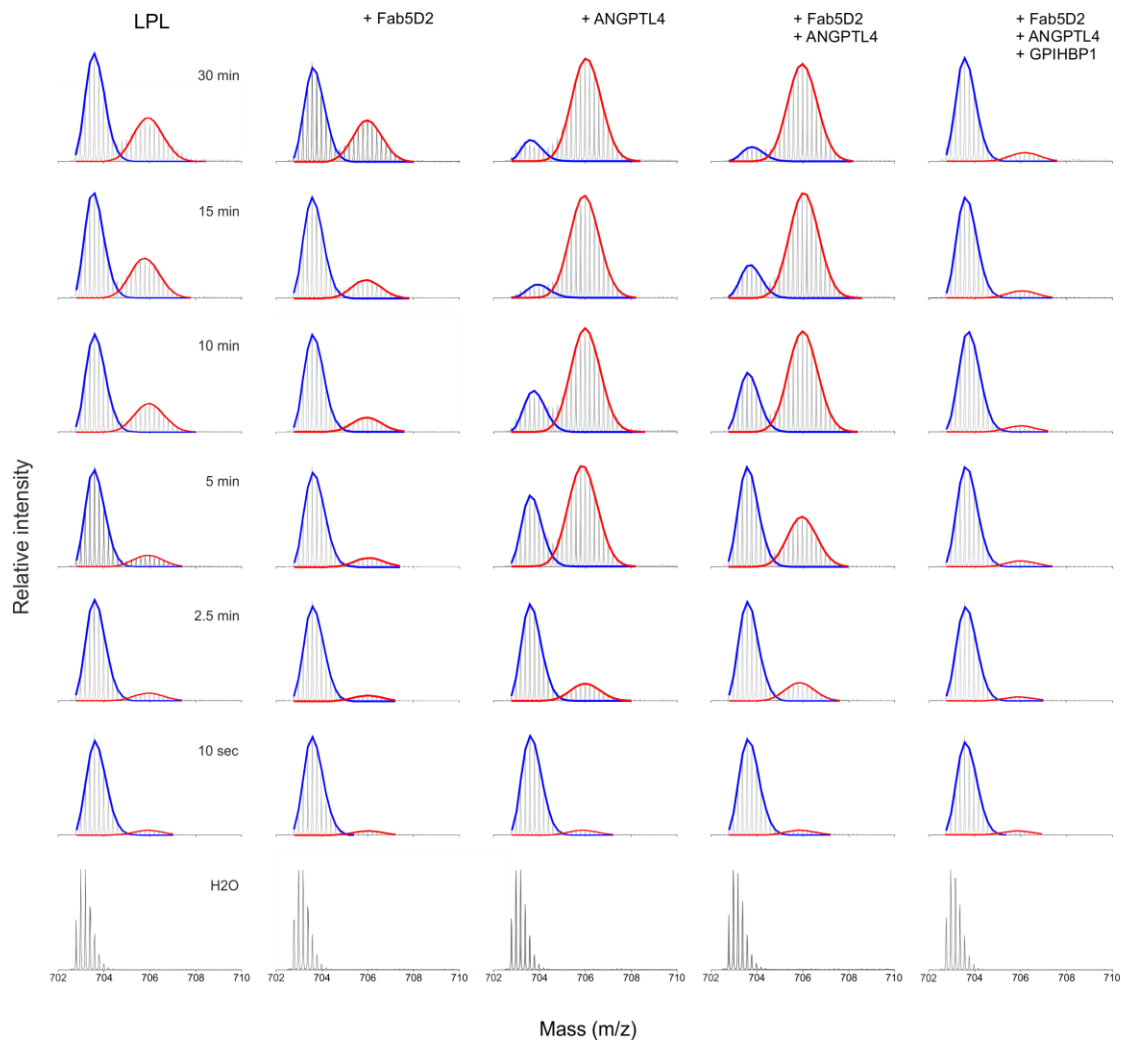

**Fig. S6.** Quantification of bimodal deuterium uptake in LPL by pulse labelling in deuterium oxide-containing buffers. The coexistence of folded and unfolded LPL in the absence and presence of sub-stoichiometric amounts of ANGPTL4 was measured by pulse-labeled HDX-MS. Shown are the isotope envelopes for a region of LPL harboring two of the three residues within the catalytic triad (residues 131–165). The progressive emergence of bimodality was quantified with the program HX-Express2 (13). The fractions of coexisting conformations in LPL are estimated by fitting two Gaussian distributions [folded state with low deuterium uptake (*blue line*) versus unfolded state with high deuterium uptake (*red line*)].

**Table S1.** Small-angle X-ray scattering data for Fab-5D2•LPL•GPIHBP1

| (a) Sample details*                                                                                                                                                                          |                                                                          |
|----------------------------------------------------------------------------------------------------------------------------------------------------------------------------------------------|--------------------------------------------------------------------------|
|                                                                                                                                                                                              | Fab-5D2•LPL•GPIHBP1                                                      |
| Organism                                                                                                                                                                                     | <i>Homo sapiens</i>                                                      |
| Source                                                                                                                                                                                       | <i>Drosophila</i> S2 (GPIHBP1); CHO cells (LPL); Sp2 myeloma cells (5D2) |
| UniProt sequence ID (residues in construct)                                                                                                                                                  | P06858 (29–475); Q8IV16 (21–151)                                         |
| Extinction coefficient $\epsilon$ (280 nm, 0.1% w/v)                                                                                                                                         | 1.322                                                                    |
| Partial specific volume $\bar{v}$ (cm <sup>3</sup> g <sup>-1</sup> )                                                                                                                         | 0.725                                                                    |
| Mean solute and solvent scattering length densities and mean scattering contrast $\Delta\bar{\rho}$ ( $\rho_{\text{protein}} - \rho_{\text{solvent}}$ ) (10 <sup>10</sup> cm <sup>-2</sup> ) | 2.75 (12.43–9.68)                                                        |
| Molecular mass $M$ from chemical composition (monomer/dimer) (Da)                                                                                                                            | 116610/233224                                                            |
| SEC–SAXS column, 5 × 150 mm Superdex S200 Increase (GE LifeScience)                                                                                                                          |                                                                          |
| Loading concentration (mg ml <sup>-1</sup> ) [A280nm]                                                                                                                                        | 3.4                                                                      |
| Injection volume (ul)                                                                                                                                                                        | 50                                                                       |
| Flow rate (ml min <sup>-1</sup> )                                                                                                                                                            | 0.3                                                                      |
| Average concentration in combined data frames (mg ml <sup>-1</sup> )                                                                                                                         | 0.4                                                                      |
| Solvent composition (solvent blanks taken from SEC flowthrough prior to elution of protein)                                                                                                  | 10 mM Tris pH 7.2, 150 mM NaCl, 10% glycerol, 0.05% CHAPS                |
| (b) SAS data collection parameters                                                                                                                                                           |                                                                          |
| Instrument/Data processing                                                                                                                                                                   | EMBL P12 (PETRA-III, DESY, Hamburg) with Pilatus6M detector (2)          |
| Wavelength (Å)                                                                                                                                                                               | 1.24                                                                     |
| Beam geometry (size, sample-to-detector distance)                                                                                                                                            | 0.12 × 0.25 mm <sup>2</sup> , 3.0 m                                      |
| $s$ -measurement range (Å <sup>-1</sup> )                                                                                                                                                    | 0.002–0.7                                                                |
| Absolute scaling method                                                                                                                                                                      | Comparison with scattering from 1.2 mm pure H <sub>2</sub> O             |
| Basis for normalization to constant counts                                                                                                                                                   | To transmitted intensity by beam-stop counter                            |
| Method for monitoring radiation damage                                                                                                                                                       | Frame comparison                                                         |
| Exposure time, number of exposures                                                                                                                                                           | 900 s (900 × 1.00 s)                                                     |
| Sample temperature (°C)                                                                                                                                                                      | 10                                                                       |

**(c) Software employed for SAS data reduction, analysis and interpretation**

|                                                                                  |                                                                                                                                                                   |
|----------------------------------------------------------------------------------|-------------------------------------------------------------------------------------------------------------------------------------------------------------------|
| SAS data reduction                                                               | <i>I(s)</i> versus <i>s</i> using <i>RADAVER</i> (ATSAS 2.8.3) (10), solvent subtraction using <i>PRIMUSqt</i> (ATSAS 2.8.3) (10)                                 |
| Calculation of $\epsilon$ from sequence                                          | <i>ProtParam</i> (14)                                                                                                                                             |
| Calculation of $\Delta\bar{\rho}$ and $\bar{v}$ values from chemical composition | <i>SASSIE web server</i> ( <a href="http://sassie-web.chem.utk.edu/sassie2/">http://sassie-web.chem.utk.edu/sassie2/</a> )                                        |
| Basic analyses: Guinier, <i>P(r)</i> , scattering particle volume ( $V_P$ )      | <i>PRIMUSqt</i> from ATSAS 2.8.3 (10)                                                                                                                             |
| Shape/bead modelling                                                             | DAMMIF (8) and DAMMIN (15) via ATSAS online ( <a href="https://www.embl-hamburg.de/biosaxs/atsas-online/">https://www.embl-hamburg.de/biosaxs/atsas-online/</a> ) |
| Atomic structure modelling                                                       | CRY SOL (7), CORAL (10)                                                                                                                                           |
| Molecular graphics                                                               | PyMOL v2.3 MacOS 10.13.6                                                                                                                                          |

**(d) Structural parameters**

|                                                                        |                     |
|------------------------------------------------------------------------|---------------------|
| <b>Guinier Analysis</b>                                                | Fab-5D2•LPL•GPIHBP1 |
| <i>I</i> (0) (cm <sup>-1</sup> )                                       | 0.023 ± 0.001       |
| <i>R<sub>g</sub></i> (Å)                                               | 48.8 ± 0.1          |
| <i>q</i> -range (Å <sup>-1</sup> )                                     | 0.012–0.015         |
| <i>M<sub>r</sub></i> from <i>I</i> (0) (Da)                            | 100300              |
| <b><i>P(r)</i> analysis</b>                                            | Fab-5D2•LPL•GPIHBP1 |
| <i>I</i> (0) (cm <sup>-1</sup> )                                       | 0.023 ± 0.002       |
| <i>R<sub>g</sub></i> (Å)                                               | 48.2 ± 0.1          |
| <i>d<sub>max</sub></i> (Å)                                             | 175 ± 5             |
| <i>q</i> -range (Å <sup>-1</sup> )                                     | 0.016–0.284         |
| $\chi^2$ (total estimate from <i>GNOM</i> )                            | 1.0 (0.37)          |
| <i>M<sub>r</sub></i> from <i>I</i> (0) (Da) (ratio to predicted value) | 100300 (0.82)       |
| Volume ( $V_P$ ) (Å <sup>3</sup> )                                     | 187506              |

**(e) Shape modelling results**

|                                                              |                     |
|--------------------------------------------------------------|---------------------|
| <i>DAMMIF</i> (default parameters, 10 calc.)                 | Fab-5D2•LPL•GPIHBP1 |
| <i>q</i> -range for fitting (Å <sup>-1</sup> )               | 0.007–0.280         |
| Symmetry/anisotropy assumptions                              | P1, none            |
| NSD (standard deviation)                                     | 1.41 (0.16)         |
| $\chi^2$ value/range                                         | 1.12–1.12           |
| Constant adjustment to intensities                           | 8.7                 |
| <i>P</i> value                                               | 0.28–0.28           |
| <i>M<sub>r</sub></i> estimate as 0.5 × volume of models (Da) | 116977              |
| Model resolution from <i>SASRES</i> (Å)                      | 47 ± 4              |

**(f) Atomistic modelling**

Fab-5D2•LPL•GPIHBP1

CORAL rigid body modeling

Starting crystal structures

PDB: 1fgn, 6e7k

Flexible residues

21–61, 145–150 (GPIHBP); 415–422, 471–475 (LPL)

Glycans added with *GLYCOSYLATION* \*C<sub>40</sub>N<sub>2</sub>O<sub>29</sub>H<sub>67</sub> (GPIHBP1) + 2 × C<sub>68</sub>N<sub>4</sub>O<sub>49</sub>H<sub>113</sub> (LPL) $q$ -range for fitting (Å)

0.012-0.50

Symmetry, anisometry assumptions

P1, none

 $\chi^2$ , CORMAP  $P$  value

1.07, 0.19

**(g) SASBDB IDs for data and models**

Fab-5D2•LPL•GPIHBP1

SASDHF4

\* For X-ray contrast, molecular weight and partial specific volume calculation it was assumed that the scattering particle consists of Fab-5D2, LPL, and GPIHBP1 with the following glycosylation composition: one C<sub>40</sub>N<sub>2</sub>O<sub>29</sub>H<sub>67</sub> (GPIHBP1) and two C<sub>68</sub>N<sub>4</sub>O<sub>49</sub>H<sub>113</sub> (LPL).



## References

1. Chang SF, Reich B, Brunzell JD, & Will H (1998) Detailed characterization of the binding site of the lipoprotein lipase-specific monoclonal antibody 5D2. *J Lipid Res* 39:2350-2359.
2. Blanchet CE, *et al.* (2015) Versatile sample environments and automation for biological solution X-ray scattering experiments at the P12 beamline (PETRA III, DESY). *J Appl Crystallogr* 48:431-443.
3. Panjkovich A & Svergun DI (2017) CHROMIXS: automatic and interactive analysis of chromatography-coupled small-angle X-ray scattering data. *Bioinformatics* 34:1944-1946.
4. Franke D, *et al.* (2017) ATSAS 2.8: a comprehensive data analysis suite for small-angle scattering from macromolecular solutions. *J Appl Crystallogr* 50:1212-1225.
5. Guinier A (1939) La diffraction des rayons X aux très petits angles : application à l'étude de phénomènes ultramicroscopiques. *Ann. Phys.* 11:161-237.
6. Semenyuk AV & Svergun DI (1991) GNOM—a program package for small-angle scattering data processing. *Journal of Applied Crystallography* 24:537-540.
7. Svergun DI, Barberato C, & Koch MHJ (1995) CRY SOL—a program to evaluate X-ray solution scattering of biological macromolecules from atomic coordinates. *J Appl Crystallogr* 28:768-773.
8. Franke D & Svergun DI (2009) DAMMIF, a program for rapid ab-initio shape determination in small-angle scattering. *J Appl Crystallogr* 42:342-346.
9. Volkov VV & Svergun DI (2003) Uniqueness of ab-initio shape determination in small-angle scattering. *J Appl Crystallogr* 36:860-864.
10. Petoukhov MV, *et al.* (2012) New developments in the ATSAS program package for small-angle scattering data analysis. *J Appl Crystallogr* 45:342-350.
11. Arora R, *et al.* (2019) Structure of lipoprotein lipase in complex with GPIHBP1. *Proc Natl Acad Sci USA* 116:10360-10365
12. Ferraro DM, Lazo N, & Robertson AD (2004) EX1 hydrogen exchange and protein folding. *Biochemistry* 43:587-594.
13. Guttman M, Weis DD, Engen JR, & Lee KK (2013) Analysis of overlapped and noisy hydrogen/deuterium exchange mass spectra. *J Am Soc Mass Spectrom* 24:1906-1912.
14. Gasteiger E, *et al.* (2005) Protein identification and analysis tools on the ExPASy server. *The Proteomics Protocols Handbook*:571-607.
15. Svergun DI (1999) Restoring low resolution structure of biological macromolecules from solution scattering using simulated annealing. *Biophys J* 76:2879-2886.
